# Supplementary figures and images for: The first bismuth phosphonate cluster. X-Ray single crystal structure of [(ButPO3)10(ButPO3H)2Bi14O10·3C6H6·4H2O]
Source: Royal Society of Chemistry journal article supplement (doi:10.1039/b107220j), 2001-01-01

**Fig. S1** XRD pattern for **2**


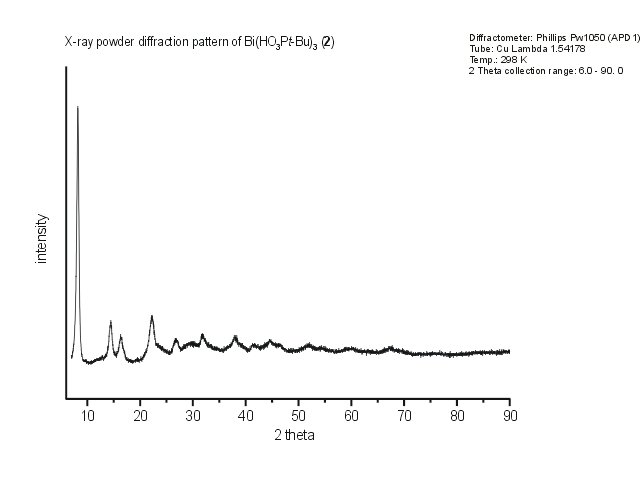

Supplement: b107220j.doc [file b107220j.doc]
